# Supplementary material
Source: MDPI journal article supplement (https://www.mdpi.com/2075-4701/11/7/1076)
Supplement: s1 [file s1]

Supplementary Material

# Selective Laser Melting of 316L Austenitic Stainless Steel: Detailed Process Understanding Using Multiphysics Simulation and Experimentation

Peyman Ansari <sup>1,\*</sup>, Asif Ur Rehman <sup>2</sup>, Fatih Pitir <sup>2</sup>, Salih Veziroglu <sup>3</sup>, Yogendra K. Mishra <sup>4</sup>, Oral Cenk Aktas <sup>3</sup> and Metin U. Salamci <sup>1,5</sup>

<sup>1</sup> Department of Mechanical Engineering, Gazi University, Ankara 06570, Turkey; msalamci@gazi.edu.tr

<sup>2</sup> ERMAKSAN, Bursa 16065, Turkey; asyf.rehman@gmail.com (A.U.R.); Fatih.Pitir@ermaksan.com.tr (F.P.)

<sup>3</sup> Chair for Multicomponent Materials, Institute of Materials Science, Faculty of Engineering, Kiel University, Kaiserstr. 2, 24143 Kiel, Germany; sve@tf.uni-kiel.de (S.V.); oca@tf.uni-kiel.de (O.C.A.)

<sup>4</sup> Mads Clausen Institute, NanoSYD, University of Southern Denmark, Alsion 2, 6400 Sønderborg, Denmark; mishra@mci.sdu.dk

<sup>5</sup> Additive Manufacturing Technologies Research Center (EKTAM), Gazi University, Ankara 06560, Turkey

\* Correspondence: [peyman.ansari@gazi.edu.tr](mailto:peyman.ansari@gazi.edu.tr)

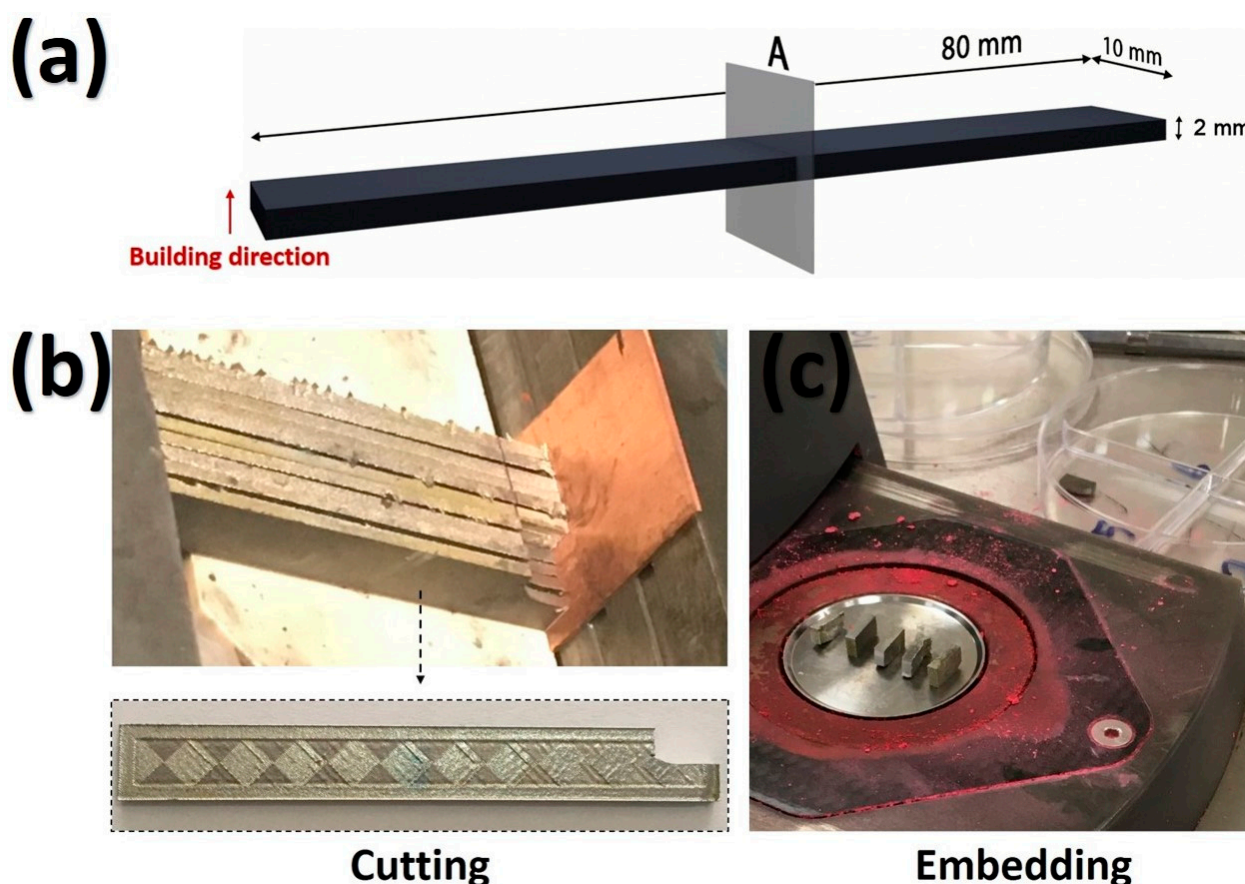

**Figure S1.** (a) Pattern and dimensions of the fabricated samples. Samples were cut in line with the plane (A) to examine the microstructure. (b) Cutting and (c) embedding the samples for microstructure inspection.

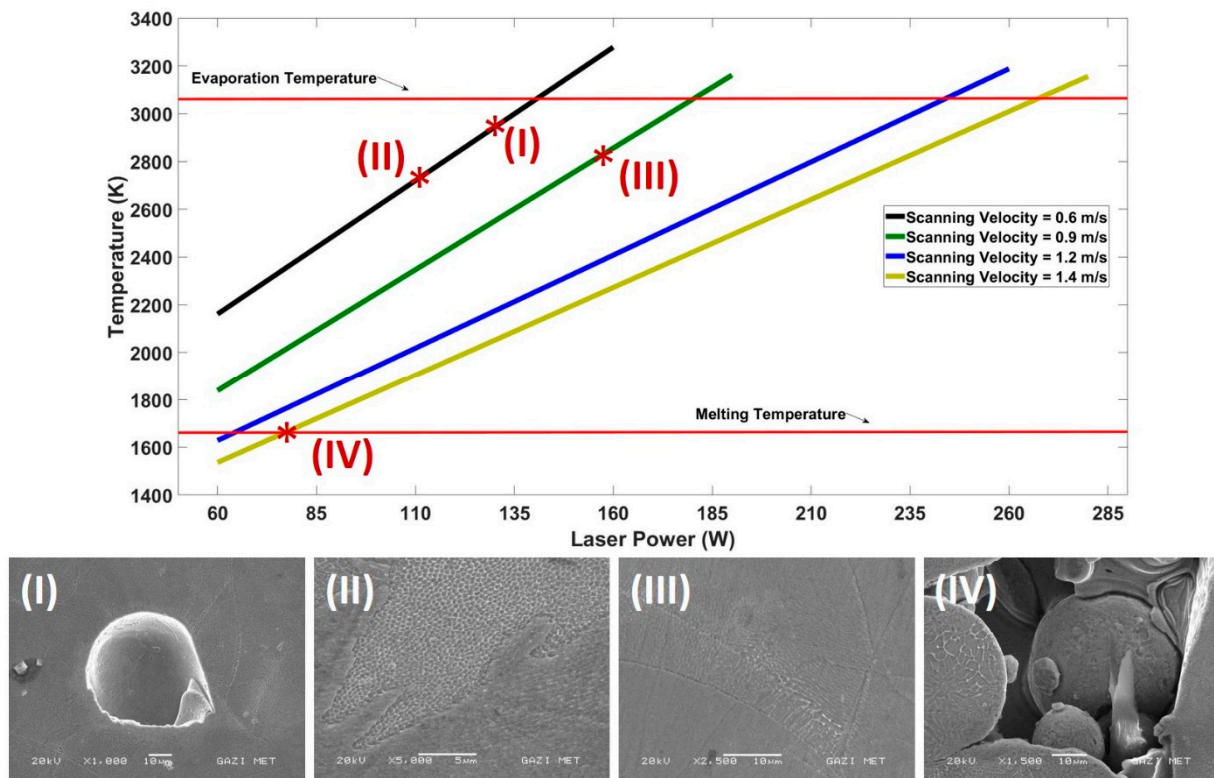

**Figure S2.** Reflection of SEM images of experimental results on simulation results with a laser spot diameter of 80  $\mu\text{m}$ .

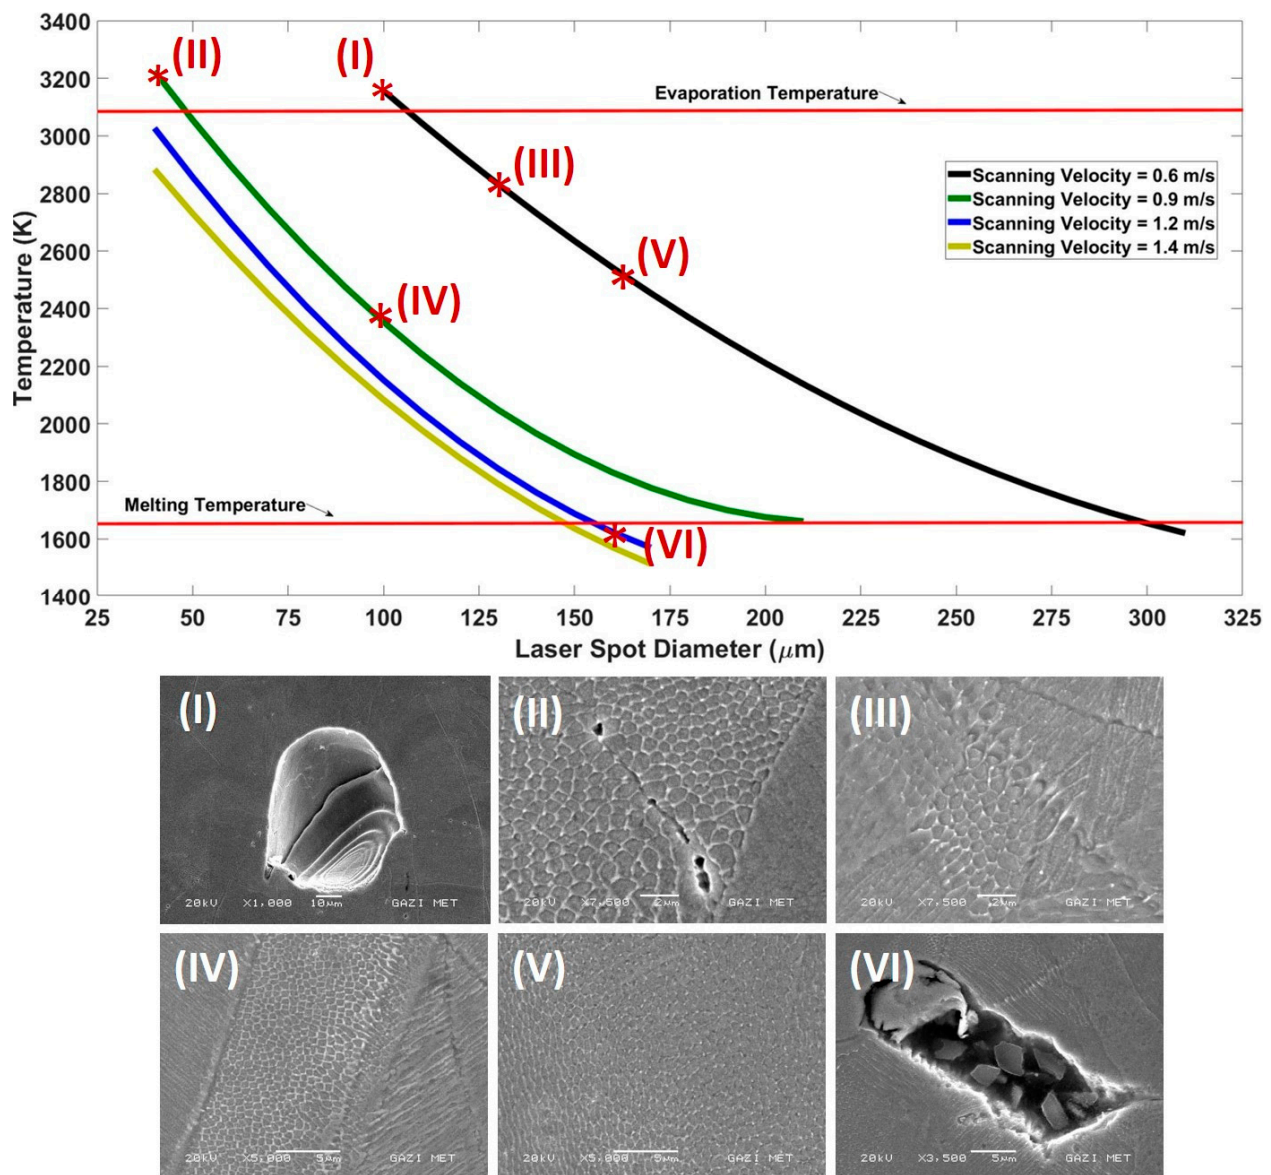

Figure S3. Reflection of SEM images of experimental results on simulation results with a laser power of 150 w.
